Letter

# ALMA observations of PSR B1259–63/LS 2883 in an inactive period: Variable circumstellar disk?

Yutaka FUJITA ,<sup>1,\*</sup> Hiroshi NAGAI,<sup>2,3</sup> Takuya AKAHORI ,<sup>4</sup> Akiko KAWACHI,<sup>5</sup> and Atsuo T. OKAZAKI<sup>6</sup>

<sup>1</sup>Department of Physics, Graduate School of Science, Tokyo Metropolitan University, 1-1 Minami-Osawa, Hachioji-shi, Tokyo 192-0397, Japan

<sup>2</sup>ALMA Project, National Astronomical Observatory Japan, 2-21-1 Osawa, Mitaka, Tokyo 181-8588, Japan

<sup>3</sup>The Graduate University for Advanced Studies, SOKENDAI, 2-21-1 Osawa, Mitaka, Tokyo 181-8588, Japan

<sup>4</sup>Mizusawa VLBI Observatory, National Astronomical Observatory Japan, 2-21-1 Osawa, Mitaka, Tokyo 181-8588, Japan

<sup>5</sup>Department of Physics, School of Science, Tokai University, Kitakaname, Hiratsuka, Kanagawa 259-1292, Japan

<sup>6</sup>Faculty of Engineering, Hokkai-Gakuen University, 1-40, 4-chome, Asahi-machi, Toyohira-ku, Sapporo, Hokkaido 062-8605, Japan

\*E-mail: [y-fujita@tmu.ac.jp](mailto:y-fujita@tmu.ac.jp)

Received 2020 June 16; Accepted 2020 June 26

## Abstract

We report Atacama Large Millimeter/submillimeter Array (ALMA) observations of the gamma-ray binary system containing the pulsar PSR B1259–63 orbiting around a massive star LS 2883 in an inactive period between the 2017 and 2021 periastron passages. We detected radio continuum emission from the binary system at 97 GHz (Band 3) and 343 GHz (Band 7). Compared with our previous ALMA observations performed soon after the 2017 periastron passage, the fluxes have decreased by a factor of six at 97 GHz and of two at 343 GHz. The flux at 343 GHz is large relative to that at 97 GHz and appears to be thermal emission from the circumstellar disk around LS 2883. The decrease of the 343 GHz flux may indicate that the disk has expanded and become partially optically thin since the disk is no longer affected by pulsar winds. The flux at 97 GHz is consistent with that expected from the pulsed emission from the pulsar, which indicates that the unpulsed emission that had been produced through pulsar-disk or pulsar-stellar wind interaction has disappeared. The image of the system is consistent with a point source and shows no sign of ejecta.

**Key words:** binaries: general — pulsars: individual (PSR B1259–63) — radio continuum: stars

## 1 Introduction

High-mass gamma-ray binaries consist of a massive B- or O-type star and a compact object (a neutron star or a black hole). So far, only seven gamma-ray binary systems have been confirmed. PSR B1259–63/LS 2883 (B1259 hereafter) is the first of these binaries whose compact object has been identified as a radio pulsar or a neutron star. In this system, the pulsar PSR B1259–63 is orbiting around the rapidly-rotating, late Oe-type or early Be-type massive ( $\gtrsim 10 M_{\odot}$ ) companion star LS 2883 with a period of 1236.7 d and an orbital eccentricity of 0.87 (Negueruela et al. 2011; Shannon et al. 2014). The spin period and the characteristic age of the pulsar are  $P = 47.76$  ms and  $P/(2\dot{P}) = 330$  kyr, respectively (Johnston et al. 1992, 1994). The distance to the system is  $2.6^{+0.4}_{-0.3}$  kpc (Miller-Jones et al. 2018). Around periastron, the pulsed emission becomes undetectable for  $\sim 35$  d, which indicates that the pulsar is eclipsed by the circumstellar disk of LS 2883 (Johnston et al. 1996). On the other hand, B1259 emits unpulsed radio and high-energy emissions, which are probably produced by interaction between the pulsar and the circumstellar disk and/or stellar winds (Johnston et al. 1996; Abdo et al. 2011). In fact, double-peaked light curves have been observed in radio and X-rays around periastron, each of which reflects disk-crossing of the pulsar (Connors et al. 2002; Johnston et al. 2005). While the radio emission appears to be synchrotron emission from electrons, the X-ray emission may be synchrotron emission or inverse Compton (IC) scattering (Chernyakova et al. 2006, 2009, 2015; Uchiyama et al. 2009; Pétri & Dubus 2011).

Close to periastron passages, TeV gamma-ray emission has been detected with the High Energy Stereoscopic System (HESS) (Aharonian et al. 2005, 2009). In an IC scenario, high-energy electrons upscatter soft UV photons stemming from the stellar and/or disk radiation field into the gamma-ray regime (Tavani et al. 1996; Kirk et al. 1999; Kong et al. 2011). The generation of TeV gamma-rays within a hadronic scenario is another explanation. In this model, the dense circumstellar disk is an ideal source of target material of ultra-relativistic particles that could produce pions and hence TeV gamma-rays (Kawachi et al. 2004; Neronov & Chernyakova 2007). GeV gamma-ray flares have been observed with the Fermi Gamma-ray Space Telescope after the passage of the pulsar through the circumstellar disk (Abdo et al. 2011; Caliendo et al. 2015; Johnson et al. 2018; Tam et al. 2018). The flares seem to be triggered by the disruption of the disk (Chernyakova et al. 2015).

Until recently, there had been no observations at  $\nu \sim 100$ –300 GHz. However, we observed B1259 with the Atacama Large Millimeter/submillimeter Array (ALMA) after the 2017 periastron passage and detected it in the millimeter

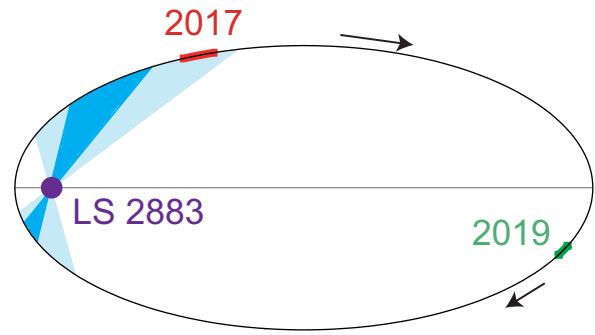

**Fig. 1.** Schematic representation of B1259 with the locations of the pulsar during the 2017 (red) and 2019 (green) observations with ALMA. Shaded area shows the geometry of the disk inferred from the X-ray data (Chernyakova et al. 2006). Darker and lighter shaded regions correspond to one and two half-opening angles of the disk, respectively. (Color online)

and submillimeter wavelengths for the first time (Fujita et al. 2019, hereafter Paper I). Our observations were made soon after the disk-crossing of the pulsar (figure 1). At Band 3 (97 GHz), the flux 84 days after the periastron was almost identical to that 71 days after the periastron. Compared with a GeV gamma-ray light curve, we concluded that the emission at 97 GHz is not related to the gamma-ray flares. The 97 GHz fluxes were consistent with an extrapolation of the radio spectrum at lower frequencies ( $\lesssim 10$  GHz). Thus, we speculated that it is the unpulsed synchrotron emission from electrons accelerated when the pulsar passed through the circumstellar disk. The flux at Band 7 (343 GHz) 69 days after the periastron was significantly larger than the extrapolation of the radio spectrum at lower frequencies. We argued that this emission is thermal, coming from the circumstellar disk around LS 2883.

In this letter, we report the results of our new observations of B1259 with ALMA around apastron (figure 1). Previous observations at low frequencies ( $\nu \lesssim 10$  GHz) have indicated that unpulsed synchrotron emission disappears in this period (Johnston et al. 1999, 2005). If the 97 GHz flux is associated with that emission, it should significantly decrease or disappear accordingly. On the other hand, if the 343 GHz emission actually comes from the disk, changes of the flux implies a long-term variability of the disk.

## 2 Observations and results

The observations were carried out in ALMA Band 3 and Band 7 in 2019 November. The data were taken in Time Division Mode (TDM) centered at the frequencies of 97 GHz and 343 GHz at Band 3 and Band 7, respectively. The data were processed using CASA 5.6.1-8 and ALMA Pipeline-CASA56-P1-B in a standard manner. The number of antennas used for the observation, total on-source time,

**Table 1.** Summary of 2019 observations.

| Band | Center freq. | Date             | $N_{\text{ant}}^*$ | On-source time <sup>†</sup> | Bandpass/flux <sup>‡</sup> | Gain <sup>§</sup> |
|------|--------------|------------------|--------------------|-----------------------------|----------------------------|-------------------|
| 3    | 97 GHz       | 2019 November 2  | 43                 | 5.5 min                     | J1617–5848                 | J1322–6532        |
| 7    | 343 GHz      | 2019 November 7  | 44                 | 5 min                       | J1107–4449                 | J1254–6111        |
| 7    | 343 GHz      | 2019 November 27 | 41                 | 5 min                       | J1337–1257                 | J1254–6111        |

\*Number of antennas used for observation.

<sup>†</sup>Total integration time of the target source.<sup>‡</sup>Bandpass and flux calibrator name.<sup>§</sup>Gain calibrator name.**Table 2.** Angular resolution, image rms, and observed fluxes for the ALMA observations in 2017 and 2019.

| Band        | Date             | Day<br>(from $t_p$ ) | Beam shape                             | Image rms<br>( $\mu\text{Jy beam}^{-1}$ ) | Observed flux<br>(mJy) |
|-------------|------------------|----------------------|----------------------------------------|-------------------------------------------|------------------------|
| 3 (97 GHz)  | 2017 December 2  | +71                  | $0''.35 \times 0''.21$ at $78^\circ$   | 41                                        | $1.1 \pm 0.1$          |
| 3 (97 GHz)  | 2017 December 15 | +84                  | $0''.42 \times 0''.36$ at $-52^\circ$  | 36                                        | $0.97 \pm 0.09$        |
| 7 (343 GHz) | 2017 November 30 | +69                  | $0''.056 \times 0''.043$ at $-8^\circ$ | 87                                        | $2.3 \pm 0.4$          |
| 3 (97 GHz)  | 2019 November 2  | +771                 | $1''.98 \times 1''.58$ at $49^\circ$   | 40                                        | $0.19 \pm 0.04$        |
| 7 (343 GHz) | 2019 November 7  | +776                 | $0''.88 \times 0''.77$ at $18^\circ$   | 90                                        | $1.12 \pm 0.13$        |
| 7 (343 GHz) | 2019 November 27 | +796                 | $0''.91 \times 0''.81$ at $-7^\circ$   | 179                                       | $>0.8$                 |

bandpass calibrator, and gain calibrator are summarized in table 1. Flux scaling was derived on the bandpass calibrator using the flux information provided by the Joint ALMA Observatory (JAO). The observation condition in terms of the weather condition and precipitable water vapor (PWV) was normal in both Band 3 and 7, but the phase root mean square (rms) per baseline visibility for the second observation in Band 7 (November 27) was at most 1.5 times larger than that for the first observation (November 7), according to the Quality Assurance (QA) 0 report. The image deconvolution was carried out using the CASA task `tclean` with the multifrequency synthesis. Since the second observation of Band 7 was carried out with a longer baseline configuration, we applied the `uv-taper` option to have a beam size similar to the first observation. Table 2 summarizes angular resolution and image rms.

Figure 2 shows the total intensity image of B1259. Significant emission is detected both in Bands 3 and 7. The source structure is point-like (figures 2a and 2b) but somewhat slightly extended in the second observation of Band 7 (figure 2c). We consider that the extended structure is not real but caused by a phase calibration error since the emission is shifted from the phase center owing to the phase calibration error; a similar level of shift and image distortion is seen in the calibrator J1337–6509, which was observed as the check source (section 10 in ALMA Technical Handbook: A. Remijan et al. 2020<sup>1</sup>). Because of the poor phase calibration, the second observation data are likely affected

by coherence loss. In fact, the peak intensity appears to be only about 70% of that for the first observation.

The obtained fluxes are shown in table 2. We also show those for our 2017 observations for comparison. The most recent periastron passage of the pulsar occurred on MJD 58018.143 (UTC 2017 September 22 03:25:55.2). We refer to the time of the passage as  $t_p$ . For the flux estimation, we carried out Gaussian model fitting to the images using the CASA task `imfit` and measured the integrated flux density. For the second observation of Band 7 ( $t_p = 796$  d), the structure is distorted (figure 2c) and thus the Gaussian is not a good representation of the source structure. Besides, the flux is likely underestimated by coherence loss due to the poor phase calibration. Thus, we show a peak intensity for the second observation of Band 7 as a lower limit of flux density. In the following sections, we do not discuss the second observation of Band 7 ( $t_p = 796$  d).

### 3 Discussion

#### 3.1 Comparison with 2017 observations

In figure 3, the radio fluxes obtained through our new ALMA observations in 2019 are shown by open circles. For comparison, we also present the results of our previous ALMA observations in 2017 using filled circles. The figure indicates that the fluxes in 2019 have decreased since our previous observations in 2017, especially at 97 GHz. In Paper I, we compared our 2017 observations with ATCA observations at low frequencies at the 2004 periastron

<sup>1</sup> Remijan, A., et al. 2019, ALMA Technical Handbook, ALMA Doc. 7.3, ver. 1.1.

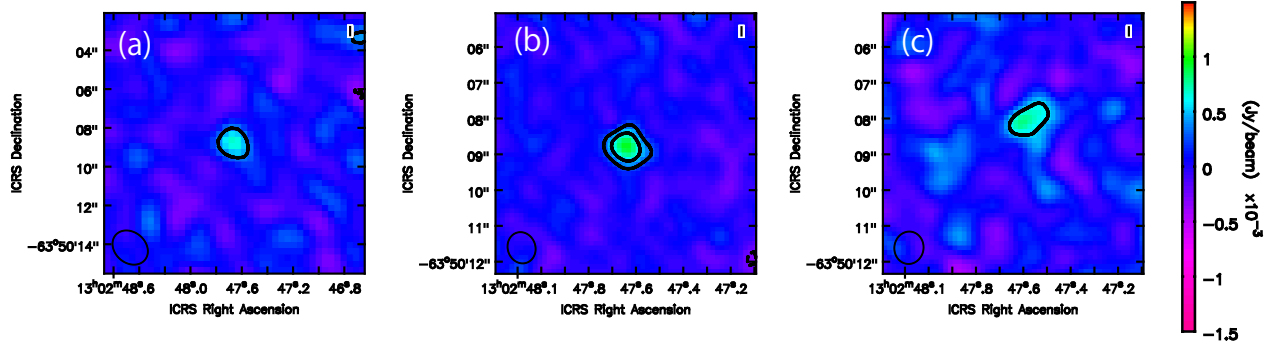

Fig. 2. (a) Band 3 image of B1259 on 2019 November 2 ( $t_p = 771$  d). (b) Band 7 image of B1259 on 2019 November 7 ( $t_p = 776$  d). (c) Band 7 image of B1259 on 2019 November 27 ( $t_p = 796$  d). Contours are plotted at the level of  $n \times 3\sigma$  ( $n = 1, 2$ ) where  $\sigma$  is the image rms summarized in table 2. (Color online)

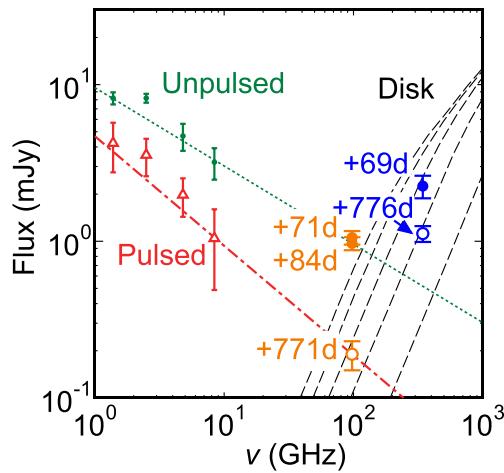

Fig. 3. Radio fluxes of B1259. Our new ALMA observations in 2019 are shown by open circles at 97 GHz (orange) and 343 GHz (blue). The labels are the days since  $t_p$ . Our previous ALMA observations in 2017 are also shown by filled circles at 97 (orange) and 343 GHz (blue). Unpulsed fluxes obtained with ATCA at  $t_p + 64.2$  d at the 2004 passage are shown by green dots (Johnston et al. 2005). The dotted green line is a spectrum represented by  $S_\nu \propto \nu^{-0.5}$ . The normalization is set so that the line passes 2017 observations at 97 GHz. Averaged pulsed fluxes obtained with ATCA before and after the 2004 passage are shown by red open triangles (Johnston et al. 2005). The associated red bars are the standard deviations of the data at individual frequencies. The dash-dotted red line is a spectrum represented by  $S_\nu \propto \nu^{-0.7}$ . The normalization is set so that the line passes the new ALMA observation at 97 GHz. Dashed black lines show the infrared emission from the circumstellar disk of LS 2883 for different disk sizes predicted by van Soelen and Meintjes (2011). The disk sizes are (from the bottom to the top) 10, 20, 30, 40 and 50  $R_*$ . (Color online)

passage (green dots in figure 3).<sup>2</sup> While fluxes at 97 GHz ( $t_p + 71$  d and  $t_p + 84$  d) are in line with an extrapolation of the unpulsed ATCA fluxes at a similar orbital phase (green dotted line), that at 343 GHz ( $t_p + 69$  d) is clearly above the extrapolation. We interpret that synchrotron emission generated through the interaction between the

<sup>2</sup> Unfortunately, the fluxes at the low frequencies for the 2017 periastron passage have not been reported.

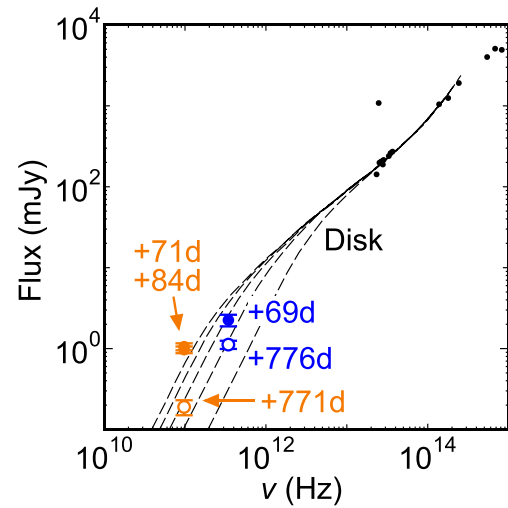

Fig. 4. Radio fluxes of B1259. Our new ALMA observations in 2019 are shown by open circles (Band 3 or 97 GHz (orange) and Band 7 or 343 GHz (blue)). The labels are the days since  $t_p$ . Our previous ALMA observations in 2017 are also shown by filled circles at 97 and 343 GHz. Dashed black lines show the infrared emission from the Be star's circumstellar disk for different disk radii predicted by van Soelen and Meintjes (2011). The disk radii are (from the bottom to the top) 10, 20, 30, 40 and 50  $R_*$ . The observational data (black dots) are those compiled by van Soelen et al. (2012; see also Westerlund & Garnier 1989; Skrutskie et al. 2006; Price et al. 2001; Negueruela et al. 2011). (Color online)

pulsar wind and the circumstellar disk is responsible for the 97 GHz flux. On the other hand, we speculate that the flux at 343 GHz is associated with the radiation from the circumstellar disk. By comparing the results with a theoretical model by van Soelen and Meintjes (2011), we estimate that the disk size is  $\sim 30 R_*$  in 2017 ( $t_p + 69$  d in figure 3), where  $R_*$  is the radius of LS 2883. Following van Soelen and Meintjes (2011), we here assume that  $R_* \sim 6 R_\odot$  (Johnston et al. 1994), although some recent observations suggest that  $R_* \sim 9 R_\odot$  (Negueruela et al. 2011).

In figure 4, we show the disk spectra predicted by van Soelen and Meintjes (2011) up to the optical band. The

spectra are insensitive to the disk radius at  $\nu \gtrsim 10^{13}$  Hz, because the disk is only partially optically thick and most emissions come from the inner disk (Waters 1986). On the other hand, they are sensitive to the disk size in the ALMA band ( $\nu \sim 100\text{--}300$  GHz), because the whole disk is optically thick (Waters 1986). In fact, at  $\nu \lesssim 300$  GHz, the dashed lines follow  $\propto \nu^2$ , or black-body radiation. We plot the results of our ALMA observations in figure 4. The spectral index of the observed fluxes between 97 GHz and 343 GHz is  $\alpha = 0.7_{-0.3}^{+0.2}$  for the 2017 observations and  $\alpha = 1.4_{-0.1}^{+0.2}$  for the 2019 observations, where the index is defined as  $S_\nu \propto \nu^\alpha$ . Since the indices are smaller than  $\alpha = 2$ , the whole emission in the ALMA bands cannot be explained by pure black-body disk radiation.

### 3.2 Origin of the radio emissions

According to our interpretation in Paper I, the decrease of the flux at 343 GHz in 2019 could be interpreted to mean that the disk radius has decreased down to  $\sim 20 R_*$  in 2019 ( $t_p + 776$  d in figure 3). If this is the case, the expected disk flux at 97 GHz is  $\sim 0.1$  mJy, which is smaller than the flux of 0.19 mJy measured in 2019 ( $t_p + 771$  d in figure 3). One possible explanation is that it is the pulsed emission from the pulsar. In figure 3, red open triangles are the averaged pulsed fluxes obtained with ATCA during the period between  $t_p - 21.5$  d and  $t_p + 186.1$  d at the 2004 periastron passage (Johnston et al. 2005). The flux at 97 GHz in 2019 is on the extrapolation of the pulsed fluxes (dash-dotted red line in figure 3). This suggests that the unpulsed component (green dotted line) had fallen below the pulsed component. Unfortunately, we cannot uncover the pulse (47.76 ms) from the ALMA data, because they are integrated every two seconds.

If the decrease of the 343 GHz flux actually reflects that of the disk size, it may mean that the disk evolves on a time-scale of a year. Numerical simulations have shown that the disk is disrupted when the pulsar approaches the disk around periastron (Okazaki et al. 2011; Takata et al. 2012). Non-thermal X-ray emissions are produced through the interaction between the pulsar wind and the disk around this period (Takata et al. 2012). However, these simulations suggest that the disk should recover after the pulsar moves away from the disk. Thus, if the disk destruction by the pulsar is only the cause of the disk variation, the flux from the disk in 2019 is expected to increase from that in 2017, which is opposite to our observational results.

Assuming that the 343 GHz flux is the black-body radiation from the disk, another possibility is that the disk has *expanded* but the optically-thick region has shrunk. This is because when the pulsar moves away from the Be star towards apastron, the outer part of the disk, which was

strongly compressed and radio optically thick near periastron, is likely to expand and become optically thin due to the decrease of the density. If this is the case, the luminosity of the disk should decrease, because it reflects the area of the optically-thick region. Since the geometry of this binary system is complicated, numerical simulations would be required to confirm this speculation.

### 3.3 X-ray ejecta

Chandra X-ray observations have revealed the existence of high-speed ejecta that appeared as an extended X-ray structure (clump) moving away from B1259 (Pavlov et al. 2011, 2015; Kargaltsev et al. 2014). The clump is ejected at every binary cycle near periastron passage (Hare et al. 2019). Although we have checked the ALMA images for both 2017 and 2019 observations, they are consistent with a point source (see section 2 and figure 2 for 2019 observations). The upper limit of the image size is given by the beam shapes (table 2).

## 4 Conclusions

We have reported the results of ALMA observations of the pulsar–massive star binary PSR B1259–63/LS 2883 at 97 and 343 GHz. The observations were made in 2019 around the apastron after the 2017 periastron passage. We detected emissions from the system both at 97 GHz and 343 GHz. However, the fluxes have decreased by a factor of six at 97 GHz and of two at 343 GHz since our observations that were made soon after the 2017 periastron passage. We argued that while the emission at 343 GHz is a thermal emission from the circumstellar disk around LS 2883, that at 97 GHz is non-thermal pulsed emission from the pulsar. In this scenario, the decrease of the 343 GHz flux may indicate that the radio optical depths of the Be disk has significantly decreased since the 2017 periastron. This could happen if the disk density, particularly in the outer region, has decreased due to the expansion of the disk, because it is no longer affected by the pulsar wind ram-pressure near apastron. This speculation could be studied via numerical simulations in the future. The fall of flux at 97 GHz indicates that the synchrotron radiation observed soon after the 2017 periastron had disappeared. We also checked the image of the system and found that it is consistent with a point source. This means that in the radio band there is no sign of ejecta that had been observed in X-rays.

## Acknowledgments

This work was supported by JSPS KAKENHI No. 18K03647 (Y.F.) and No. JP18K03709 (H.N.). This paper makes use of the following ALMA data: ADS/JAO.ALMA#2019.1.00320.S. and



2017.1.01188.S. ALMA is a partnership of ESO (representing its member states), NSF (USA) and NINS (Japan), together with NRC (Canada), MOST and ASIAA (Taiwan), and KASI (Republic of Korea), in cooperation with the Republic of Chile. The Joint ALMA Observatory is operated by ESO, AUI/NRAO and NAOJ.

## References

- Abdo, A. A., et al. 2011, *ApJ*, 736, L11
- Aharonian, F., et al. 2005, *A&A*, 442, 1
- Aharonian, F., et al. 2009, *A&A*, 507, 389
- Caliandro, G. A., Cheung, C. C., Li, J., Scargle, J. D., Torres, D. F., Wood, K. S., & Chernyakova, M. 2015, *ApJ*, 811, 68
- Chernyakova, M., et al. 2015, *MNRAS*, 454, 1358
- Chernyakova, M., Neronov, A., Aharonian, F., Uchiyama, Y., & Takahashi, T. 2009, *MNRAS*, 397, 2123
- Chernyakova, M., Neronov, A., Lutovinov, A., Rodriguez, J., & Johnston, S. 2006, *MNRAS*, 367, 1201
- Connors, T. W., Johnston, S., Manchester, R. N., & McConnell, D. 2002, *MNRAS*, 336, 1201
- Fujita, Y., Kawachi, A., Akahori, T., Nagai, H., & Yamaguchi, M. 2019, *PASJ*, 71, L3 (Paper I)
- Hare, J., Kargaltsev, O., Pavlov, G., & Beniamini, P. 2019, *ApJ*, 882, 74
- Johnson, T. J., Wood, K. S., Kerr, M., Corbet, R. H. D., Cheung, C. C., Ray, P. S., & Omodei, N. 2018, *ApJ*, 863, 27
- Johnston, S., Ball, L., Wang, N., & Manchester, R. N. 2005, *MNRAS*, 358, 1069
- Johnston, S., Manchester, R. N., Lyne, A. G., Bailes, M., Kaspi, V. M., Qiao, G., & D'Amico, N. 1992, *ApJ*, 387, L37
- Johnston, S., Manchester, R. N., Lyne, A. G., D'Amico, N., Bailes, M., Gaensler, B. M., & Nicastro, L. 1996, *MNRAS*, 279, 1026
- Johnston, S., Manchester, R. N., Lyne, A. G., Nicastro, L., & Spyromilio, J. 1994, *MNRAS*, 268, 430
- Johnston, S., Manchester, R. N., McConnell, D., & Campbell-Wilson, D. 1999, *MNRAS*, 302, 277
- Kargaltsev, O., Pavlov, G. G., Durant, M., Volkov, I., & Hare, J. 2014, *ApJ*, 784, 124
- Kawachi, A., et al. 2004, *ApJ*, 607, 949
- Kirk, J. G., Ball, L., & Skjæraasen, O. 1999, *Astroparticle Phys.*, 10, 31
- Kong, S. W., Yu, Y. W., Huang, Y. F., & Cheng, K. S. 2011, *MNRAS*, 416, 1067
- Miller-Jones, J. C. A., et al. 2018, *MNRAS*, 479, 4849
- Negueruela, I., Ribó, M., Herrero, A., Lorenzo, J., Khangulyan, D., & Aharonian, F. A. 2011, *ApJ*, 732, L11
- Neronov, A., & Chernyakova, M. 2007, *Ap&SS*, 309, 253
- Okazaki, A. T., Nagataki, S., Naito, T., Kawachi, A., Hayasaki, K., Owocki, S. P., & Takata, J. 2011, *PASJ*, 63, 893
- Pavlov, G. G., Chang, C., & Kargaltsev, O. 2011, *ApJ*, 730, 2
- Pavlov, G. G., Hare, J., Kargaltsev, O., Rangelov, B., & Durant, M. 2015, *ApJ*, 806, 192
- Pétri, J., & Dubus, G. 2011, *MNRAS*, 417, 532
- Price, S. D., Egan, M. P., Carey, S. J., Mizuno, D. R., & Kuchar, T. A. 2001, *AJ*, 121, 2819
- Shannon, R. M., Johnston, S., & Manchester, R. N. 2014, *MNRAS*, 437, 3255
- Skrutskie, M. F., et al. 2006, *AJ*, 131, 1163
- Takata, J., et al. 2012, *ApJ*, 750, 70
- Tam, P. H. T., He, X.-B., Pal, P. S., & Cui, Y. 2018, *ApJ*, 862, 165
- Tavani, M., et al. 1996, *A&AS*, 120, 221
- Uchiyama, Y., Tanaka, T., Takahashi, T., Mori, K., & Nakazawa, K. 2009, *ApJ*, 698, 911
- van Soelen, B., & Meintjes, P. J. 2011, *MNRAS*, 412, 1721
- van Soelen, B., Meintjes, P. J., Odendaal, A., & Townsend, L. J. 2012, *MNRAS*, 426, 3135
- Waters, L. B. F. M. 1986, *A&A*, 162, 121
- Westerlund, B. E., & Garnier, R. 1989, *A&AS*, 78, 203
